# Supplementary material for: PyBindingCurve, Simulation, and Curve Fitting to Complex Binding Systems at Equilibrium
Source: PubMed Central journal article supplement — J Chem Inf Model. 2021 May 18;61(6):2911–5. doi: 10.1021/acs.jcim.1c00216 (PMC8243321; doi:10.1021/acs.jcim.1c00216), 2021-05-18
Supplement: ci1c00216_si_001.pdf [file ci1c00216_si_001.pdf]

# Supporting information

## PyBindingCurve, simulation and curve fitting to complex binding systems at equilibrium

Steven Shave<sup>1\*</sup>, Yan-Kai Chen<sup>1</sup>, Nhan T. Pham<sup>1</sup>, and Manfred Auer<sup>1\*</sup>

<sup>1</sup> University of Edinburgh, School of Biological Sciences, University of Edinburgh, The King's Buildings, Max Born Crescent, CH Waddington Building, Edinburgh, Scotland EH9 3BF, United Kingdom

\*corresponding authors: s.shave@ed.ac.uk, manfred.auer@ed.ac.uk

PyBindingCurve source code available at <https://github.com/stevenshave/pybindingcurve>

### Contents

|                                                                                                                                                                                                                  |    |
|------------------------------------------------------------------------------------------------------------------------------------------------------------------------------------------------------------------|----|
| Supporting Equation 1; deriving the fraction ligand bound for 1:1 binding systems.....                                                                                                                           | 3  |
| Supporting Equation 2; deriving the fraction total possible dimer present in the dimer formation system.....                                                                                                     | 4  |
| Supporting Code Listing 1; Mathematica code solving fraction ligand bound to protein in a 1:1 binding system.....                                                                                                | 5  |
| Supporting Code Listing 2; Mathematica code solving fraction ligand bound to protein in a 1:1:1 competition binding system.....                                                                                  | 6  |
| Supporting Code Listing 3; Mathematica solving the fraction total possible dimer present in the dimer formation system.....                                                                                      | 7  |
| Supporting Code Listing 4; Mathematica solving the fraction total possible dimer present in the dimer formation system in the presence of a dimerization inhibitor.....                                          | 8  |
| Supporting Code Listing 5; Python code solving 1:1 binding at equilibrium using root finding and minimization of a constrained system and returning a dictionary of concentrations.....                          | 9  |
| Supporting Code Listing 6; Python code solving 1:1:1 binding at equilibrium using root finding and minimization of a constrained system and returning a dictionary of concentrations.....                        | 9  |
| Supporting Code Listing 7; Python code solving homodimer complexation at equilibrium using root finding and minimization of a constrained system and returning a dictionary of concentrations.....               | 10 |
| Supporting Code Listing 8; Python code solving homodimer breaking with an inhibitor at equilibrium using root finding and minimization of a constrained system and returning a dictionary of concentrations..... | 10 |
| Supporting Code Listing 9; Python code solving 1:1 binding at equilibrium kinetically and returning protein-ligand complex concentration.....                                                                    | 11 |

|                                                                                                                                                   |    |
|---------------------------------------------------------------------------------------------------------------------------------------------------|----|
| Supporting Code Listing 10; Python code solving 1:1:1 binding at equilibrium kinetically and returning protein-ligand complex concentration.....  | 11 |
| Supporting Code Listing 11; Python code solving homodimer complexation at equilibrium kinetically and returning dimer complex concentration. .... | 11 |
| Supporting Code Listing 12; Python code solving homodimer breaking with an inhibitor kinetically and returning dimer complex concentration. ....  | 12 |
| PyBindingCurve User guide .....                                                                                                                   | 13 |
| Installation .....                                                                                                                                | 13 |
| Requirements .....                                                                                                                                | 13 |
| Licence.....                                                                                                                                      | 13 |
| Tutorial.....                                                                                                                                     | 14 |
| Simulation of 1:1 binding and exploration of all options .....                                                                                    | 14 |
| Fitting of data to 1:1 binding .....                                                                                                              | 18 |
| 1:1:1 competition simulation .....                                                                                                                | 21 |
| Fitting to 1:1:1 competition .....                                                                                                                | 23 |
| Homodimer formation simulation .....                                                                                                              | 25 |
| Fitting to homodimer formation .....                                                                                                              | 27 |
| Homodimer breaking simulation .....                                                                                                               | 29 |
| Fitting to homodimer breaking .....                                                                                                               | 31 |
| Simulation of custom binding systems .....                                                                                                        | 33 |
| Documentation and API.....                                                                                                                        | 38 |
| pbc.BindingCurve .....                                                                                                                            | 40 |
| pbc.systems and shortcut strings.....                                                                                                             | 43 |
| pbc.BindingSystem .....                                                                                                                           | 44 |
| pbc.Readout .....                                                                                                                                 | 45 |

Supporting Equation 1; deriving the fraction ligand bound for 1:1 binding systems.

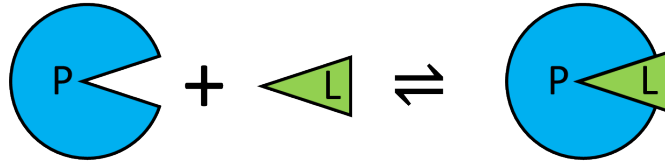

$$[P] = [P_f] + [PL]$$

$$[L] = [L_f] + [PL]$$

$$K_D = \frac{[P_f] \cdot [L_f]}{[PL]}$$

$$K_D = \frac{([P] - [PL]) \cdot ([L] - [PL])}{[PL]}$$

$$K_D[PL] = ([P] - [PL])([L] - [PL])$$

$$K_D[PL] = [P][L] - [P][PL] - [L][PL] + [PL]^2$$

$$0 = [P][L] - K_D[PL] - [P][PL] - [L][PL] + [PL]^2$$

$$0 = [P][L] - [PL](K_D + [P] + [L]) + [PL]^2$$

$$[PL]^2 - ([P] + [L] + K_D)[PL] + [P][L] = 0$$

The quadratic equation above can be solved using the quadratic formula and the helper variables:

$$a = 1,$$

$$b = -(P + L + K_D),$$

$$c = [P][L]$$

Resulting in

$$[PL] = \frac{([P] + [L] + K_D) \pm \sqrt{([P] + [L] + K_D)^2 - 4[P][L]}}{2}$$

**Note: the negative root of the above equation is the physically relevant solution.**

Where  $[P]$  is the total protein concentration,  $[P_f]$  is the free (unbound) protein concentration,  $[L]$  is the total ligand concentration,  $[L_f]$  is the free (unbound) ligand concentration,  $[K_D]$  is the protein-ligand complex dissociation constant ( $K_D$ ), and  $[PL]$  is the protein-ligand complex concentration.

Supporting Equation 2; deriving the fraction total possible dimer present in the dimer formation system

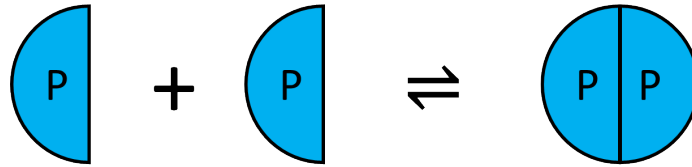

$$[P] = [P_f] + 2[PP]$$

$$K_D = \frac{[P_f] \cdot [P_f]}{[PP]}$$

$$K_D = \frac{([P] - 2[PP])([P] - 2[PP])}{[PP]}$$

$$K_D[PP] = ([P] - 2[PP])([P] - 2[PP])$$

$$K_D[PP] = [P]^2 - 4[P][PP] + 4[PP]^2$$

$$4[PP]^2 - 4[P][PP] + [P]^2 - K_D[PP] = 0$$

$$4[PP]^2 - (4[P] + K_D)[PP] + [P]^2 = 0$$

The quadratic equation above can be solved using the quadratic formula and the helper variables:

$$a = 4,$$

$$b = -(4[P] + K_D),$$

$$c = [P]^2$$

Resulting in

$$[PP] = \frac{4[P] + K_D \pm \sqrt{(4[P] + K_D)^2 - 16[P]^2}}{8}$$

**Note: similar to 1:1 binding, the negative root of the above equation is the physically relevant solution.**

Where  $[P]$  is the total protein (monomer) concentration,  $[P_f]$  is the free (unbound) protein concentration,  $[K_D]$  is the dissociation constant ( $K_D$ ) of the dimer, and  $[PP]$  is the dimer complex concentration.

A similar derivation is also available in Supporting material of: Benfield CT, Mansur DS, McCoy LE, Ferguson BJ, Bahar MW, Oldring AP, Grimes JM, Stuart DI, Graham SC, Smith GL (2011) Mapping the I  $\kappa$  B kinase  $\beta$  (IKK $\beta$ )-binding interface of the B14 protein, a vaccinia virus inhibitor of IKK $\beta$ -mediated activation of nuclear factor  $\kappa$  B. J Biol Chem 286: 20727-20735

## Supporting Code Listing 1; Mathematica code solving fraction ligand bound to protein in a 1:1 binding system

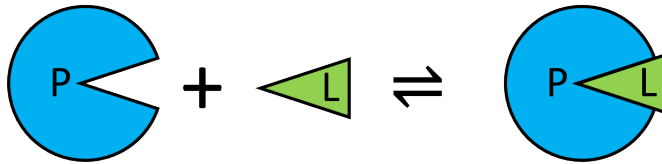

```
Clear["Global`*"]
eqtn = {
  p == pf + pl,
  l == lf + pl,
  pl*Kdpl == pf*lf,
  y == ymin + ((ymax - ymin)*pl)/l
};
toEliminate = {pf, lf, pl};
Solve[Simplify[Eliminate[eqtn, toEliminate]], y]
```

| Symbol | Meaning                                  |
|--------|------------------------------------------|
| p      | Total protein concentration              |
| pf     | Free protein concentration               |
| l      | Total ligand concentration               |
| lf     | Free ligand concentration                |
| pl     | Protein-ligand complex concentration     |
| Kdpl   | The $K_D$ for the protein-ligand complex |
| ymin   | The minimum baseline readout signal      |
| ymax   | The maximum readout intensity            |
| y      | Fraction ligand bound to protein         |

Output:

$$\left\{ \left\{ y \rightarrow -\frac{1}{2l} \left( -(ymax - ymin) \sqrt{Kdpl^2 + 2 Kdpl l + 2 Kdpl p + l^2 - 2 l p + p^2} - Kdpl ymax + Kdpl ymin - l ymax - l ymin - p ymax + p ymin \right) \right\}, \right. \\ \left. \left\{ y \rightarrow -\frac{1}{2l} \left( (ymax - ymin) \sqrt{Kdpl^2 + 2 Kdpl l + 2 Kdpl p + l^2 - 2 l p + p^2} - Kdpl ymax + Kdpl ymin - l ymax - l ymin - p ymax + p ymin \right) \right\} \right\}$$

Supporting Code Listing 2; Mathematica code solving fraction ligand bound to protein in a 1:1:1 competition binding system

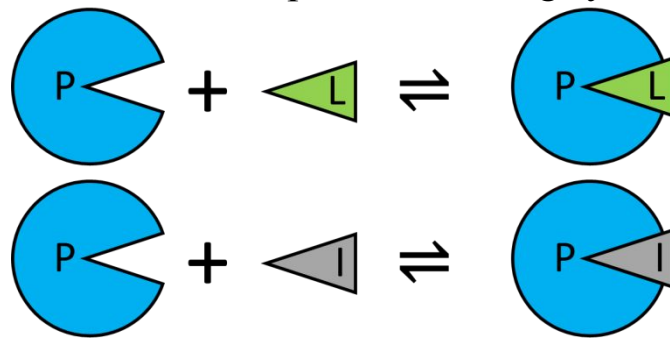

```
Clear["Global`*"]
eqtn = {
  p == pf + pl + pi,
  i == if + pi,
  l == lf + pl,
  pl*Kdpl == pf*lf,
  pi*Kdpi == pf*if,
  y == ymin + ((ymax - ymin)*pl/l)};
toEliminate = {pf, lf, if, pi, pl};
Solve[Simplify[Eliminate[eqtn, toEliminate]], y]
```

| Symbol | Meaning                                     |
|--------|---------------------------------------------|
| p      | Total protein concentration                 |
| pf     | Free protein concentration                  |
| i      | Total inhibitor concentration               |
| if     | Free inhibitor concentration                |
| l      | Total (labelled) ligand concentration       |
| lf     | Free (labelled) ligand concentration        |
| pl     | Protein-ligand complex concentration        |
| pi     | Protein-inhibitor complex concentration     |
| Kdpl   | The $K_D$ for the protein-ligand complex    |
| Kdpi   | The $K_D$ for the protein-inhibitor complex |
| ymin   | The minimum baseline readout signal         |
| ymax   | The maximum readout intensity               |
| y      | Fraction ligand bound to protein            |

Output too large to list here, can be found converted to Python code in the source code at:

[https://github.com/stevenshave/pybindingcurve/blob/master/pybindingcurve/systems/analytical\\_equations.py](https://github.com/stevenshave/pybindingcurve/blob/master/pybindingcurve/systems/analytical_equations.py)

### Supporting Code Listing 3; Mathematica solving the fraction total possible dimer present in the dimer formation system

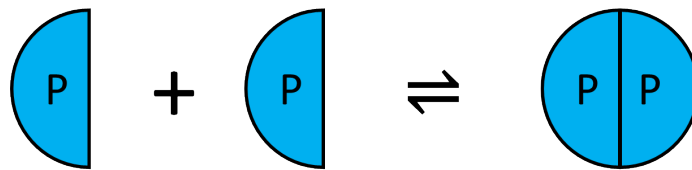

```
Clear["Global`*"]
eqtn = {
  p == pf + (2*pp),
  pp*Kdpp == pf*pf,
  y == ymin + ((ymax - ymin)*(2*pp/p))};
toEliminate = {pf, pp};
Solve[Simplify[Eliminate[eqtn, toEliminate]], y]
```

| Symbol | Meaning                                 |
|--------|-----------------------------------------|
| $p$    | Total protein concentration             |
| $pf$   | Free protein concentration              |
| $pp$   | Total dimer concentration               |
| $Kdpp$ | The $K_D$ for the protein dimer complex |
| $ymin$ | The minimum baseline readout signal     |
| $ymax$ | The maximum readout intensity           |
| $y$    | Fraction possible dimer                 |

Output:

$$\left\{ \left\{ y \rightarrow \frac{1}{4} \left( -\frac{\sqrt{Kdpp} \sqrt{Kdpp + 8 p} (ymax - ymin)}{p} + \frac{Kdpp ymax}{p} - \frac{Kdpp ymin}{p} + 4 ymax \right) \right\}, \right. \\ \left. \left\{ y \rightarrow \frac{1}{4} \left( \frac{\sqrt{Kdpp} \sqrt{Kdpp + 8 p} (ymax - ymin)}{p} + \frac{Kdpp ymax}{p} - \frac{Kdpp ymin}{p} + 4 ymax \right) \right\} \right\}$$

Supporting Code Listing 4; Mathematica solving the fraction total possible dimer present in the dimer formation system in the presence of a dimerization inhibitor

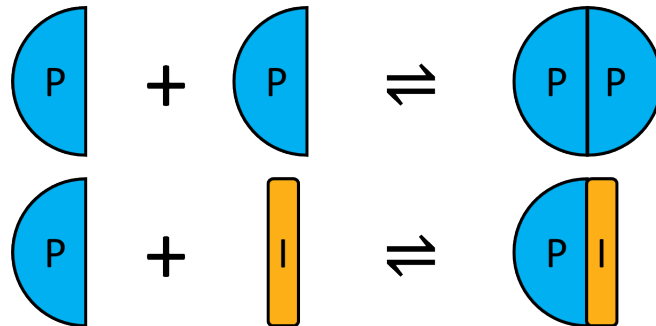

```
Clear["Global`*"]
eqtn4 = {
  p == pf + (2*pp) + pi,
  i == if + pi,
  pp*Kdpp == pf*pf,
  pi*Kdpi == pf*if,
  y == ymin + ((ymax - ymin)*(2*pp/p));
toEliminate = {pf, if, pi, pp};
Solve[Simplify[Eliminate[eqtn4, toEliminate]], y]
```

| Symbol | Meaning                                     |
|--------|---------------------------------------------|
| p      | Total protein concentration                 |
| pf     | Free protein concentration                  |
| pp     | Total dimer concentration                   |
| i      | Total inhibitor concentration               |
| if     | Free inhibitor concentration                |
| pi     | Protein-inhibitor complex concentration     |
| Kdpp   | The $K_D$ for the protein dimer complex     |
| Kdpi   | The $K_D$ for the protein-inhibitor complex |
| ymin   | The minimum baseline readout signal         |
| ymax   | The maximum readout intensity               |
| y      | Fraction ligand bound to protein            |

Output too large to list here, can be found converted to Python code in the source code at:

[https://github.com/stevenshave/pybindingcurve/blob/master/pybindingcurve/systems/analytical\\_equations.py](https://github.com/stevenshave/pybindingcurve/blob/master/pybindingcurve/systems/analytical_equations.py)



Supporting Code Listing 5; Python code solving 1:1 binding at equilibrium using root finding and minimization of a constrained system and returning a dictionary of concentrations.

```
from mpmath import mpf, findroot
def system01_minimizer(p, l, kdpl):
    p = mpf(p)
    l = mpf(l)
    kdpl = mpf(kdpl)
    if kdpl==0:
        kdpl+=1e-10
    def f(p_f, l_f):
        p1 = p_f * l_f / kdpl
        return p - (p_f + p1), l - (l_f + p1)
    p_f, l_f = findroot(f, [p*0.5, l*0.5], tol=1e-10, solver="anderson")
    return {"pf": p_f, "lf": l_f, "p1": (p_f * l_f) / kdpl}
```

Supporting Code Listing 6; Python code solving 1:1:1 binding at equilibrium using root finding and minimization of a constrained system and returning a dictionary of concentrations.

```
from mpmath import mpf, findroot
# 1:1:1 competition - see
# https://stevenshave.github.io/pybindingcurve/simulate_competition.html
def system02_minimizer(p, l, i, kdpl, kdpi):
    kdpl = mpf(kdpl)
    kdpi = mpf(kdpi)
    if kdpl==0:
        kdpl+=1e-10
    if kdpi==0:
        kdpi+=1e-10
    p = mpf(p)
    l = mpf(l)
    i = mpf(i)
    def f(p_f, l_f, i_f):
        p1 = p_f * l_f / kdpl
        pi = p_f * i_f / kdpi
        return p - (p_f + p1 + pi), l - (l_f + p1), i - (i_f + pi)
    p_f, l_f, i_f = findroot(f, [p*0.5, l*0.5, i*0.5], tol=1e-10, solver="anderson")
    return {
        "pf": p_f,
        "lf": l_f,
        "if": i_f,
        "p1": (p_f * l_f) / kdpl,
        "pi": (p_f * i_f) / kdpi,
    }
```

Supporting Code Listing 7; Python code solving homodimer complexation at equilibrium using root finding and minimization of a constrained system and returning a dictionary of concentrations.

```
from mpmath import mpf, findroot
def system03_minimizer(p, kdpp):
    p = mpf(p)
    kdpp = mpf(kdpp)
    if kdpp==0:
        kdpp+=1e-10
    def f(p_f):
        pp = p_f * p_f / kdpp
        return p - (p_f + 2 * pp)
    p_f = findroot(f, [mpf(0), p], tol=1e-10, solver="anderson")
    return {"pf": p_f, "pp": (p_f * p_f) / kdpp}
```

Supporting Code Listing 8; Python code solving homodimer breaking with an inhibitor at equilibrium using root finding and minimization of a constrained system and returning a dictionary of concentrations.

```
from mpmath import mpf, findroot
def system04_minimizer(p, i, kdpp, kdpi):
    p = mpf(p)
    i = mpf(i)
    kdpp = mpf(kdpp)
    kdpi = mpf(kdpi)
    if kdpp==0:
        kdpp+=1e-10
    if kdpi==0:
        kdpi+=1e-10
    def f(p_f, i_f):
        pp = p_f * p_f / kdpp
        pi = p_f * i_f / kdpi
        return p - (p_f + pi + 2 * pp), i - (i_f + pi)
    p_f, i_f = findroot(f, (0, max(p,i)), tol=1e-10, solver="anderson")
    return {"pf": p_f, "if": i_f, "pp": (p_f * p_f) / kdpp, "pi": (p_f * i_f) / kdpi}
```

Supporting Code Listing 9; Python code solving 1:1 binding at equilibrium kinetically and returning protein-ligand complex concentration.

```
import numpy as np
from scipy.integrate import solve_ivp
def system01_p_l_Kd_pl(parameters: dict, interval=(0, 100)):
    p, l, Kdpl = np.float64(parameters['p']), np.float64(parameters['l']),
np.float64(parameters['Kdpl'])
    def ode(concs, t, Kdpl):
        p, l, pl = concs
        r1 = -p*l + Kdpl*pl
        dpdt = r1
        dltd = r1
        dpldt = - r1
        return [dpdt, dltd, dpldt]
    return solve_ivp(lambda t,y:ode(y,t,Kdpl), interval, [p,l,0.0]).y[2,-1]
```

Supporting Code Listing 10; Python code solving 1:1:1 binding at equilibrium kinetically and returning protein-ligand complex concentration.

```
import numpy as np
from scipy.integrate import solve_ivp
def system02_p_l_i_Kdpl_Kdpi_pl(parameters: dict, interval=(0, 100)):
    p, l, i, Kdpl, Kdpi = np.float64(parameters['p']), np.float64(parameters['l']),
np.float64(parameters['i']), np.float64(parameters['Kdpl']),
np.float64(parameters['Kdpi'])
    def ode(concs, t, Kdpl, Kdpi):
        p, l, i, pl, pi = concs
        r1 = -p*l + Kdpl*pl
        r2 = -p*i + Kdpi*pi
        dpdt = r1 + r2
        dltd = r1
        didt = r2
        dpldt = - r1
        dpidt = - r2
        return [dpdt, dltd, didt, dpldt, dpidt]
```

Supporting Code Listing 11; Python code solving homodimer complexation at equilibrium kinetically and returning dimer complex concentration.

```
import numpy as np
from scipy.integrate import solve_ivp
def system03_p_Kdpp_pp(parameters: dict, interval=(0, 100)):
    p, Kdpp = np.float64(parameters['p']), np.float64(parameters['Kdpp'])
    def ode(concs, t, Kdpp):
        p, pp = concs
        r1 = -(p*p) + Kdpp*pp
        dpdt = 2*r1
        dppdt = - r1
```

```
        return [dpdt, dppdt]
    return solve_ivp(lambda t,y:ode(y,t,Kdpp), interval, [p,0.0]).y[1,-1]
```

Supporting Code Listing 12; Python code solving homodimer breaking with an inhibitor kinetically and returning dimer complex concentration.

```
import numpy as np
from scipy.integrate import solve_ivp
def system04_p_i_Kdpp_Kdpi__pp(parameters: dict, interval=(0, 100)):
    p, i, Kdpp, Kdpi = np.float64(parameters['p']), np.float64(parameters['i']),
np.float64(parameters['Kdpp']), np.float64(parameters['Kdpi'])
    def ode(concs, t, Kdpp, Kdpi):
        p, i, pp, pi = concs
        r_pp = -(p*p) + Kdpp*pp
        r_pi = -p*i + Kdpi*pi
        dpdt = 2*r_pp + r_pi
        didt = r_pi
        dppdt = -r_pp
        dpidt = -r_pi
        return [dpdt, didt, dppdt, dpidt]
    return solve_ivp(lambda t,y:ode(y,t,Kdpp, Kdpi), interval, [p, i, 0.0, 0.0]).y[2,-1]
```

# PyBindingCurve User guide

PyBindingCurve is a Python package for simulation, plotting and fitting of experimental parameters to protein-ligand binding systems at equilibrium. In simple terms, the most basic functionality allows simulation of a two species binding to each other as a function of their concentrations and the dissociation constant ( $K_D$ ) between the two species.

## Installation

PyBindingCurve may be installed from source present in the GitHub repository <https://github.com/stevenshave/pybindingcurve> via git pull, or from the Python Package Index (<https://pypi.org/project/pybindingcurve/>) using the command :

```
pip install pybindingcurve
```

## Requirements

PyBindingCurve requires Python 3.7 or later due to custom binding systems making use of ordered dictionary keys. The following packages are also required

- Matplotlib (2.x)
- Numpy (1.15.x)
- lm\_fit (1.0.0)
- mpmath (1.1.0)
- autograd (1.3)

## License

[MIT License](#)

## Tutorial

### Simulation of 1:1 binding and exploration of all options

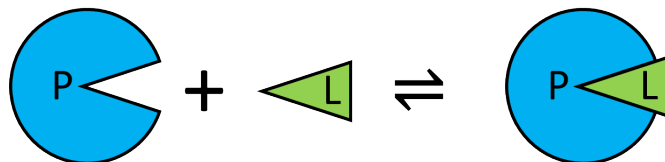

Example code is available here:

[https://github.com/stevenshave/pybindingcurve/blob/master/example\\_1to1\\_simulation.py](https://github.com/stevenshave/pybindingcurve/blob/master/example_1to1_simulation.py)

A 1:1 binding system typically consists of a protein and a ligand. However, this 1:1 system is suitable for simulation of any two different species forming a complex. This system can therefore be used to simulate hetero-dimer formation, where two different proteins form a complex. In this simple example, we will imagine wanting to know the concentration of a complex formed. We can choose to work in a common unit, typically nM, or  $\mu\text{M}$ , as long as all numbers are in the same unit, the result is valid. We assume  $\mu\text{M}$  for all concentrations and  $K_D$ s below.

First, we may want to produce a plot of protein vs complex concentration for a fixed amount of ligand, simulating the titration of protein into a cuvette for example. We must import PyBindingCurve and NumPy, and then make a new BindingCurve object which takes as an argument the type of system that should be represented. In this case “1:1” will define the correct system. For a list of all systems, please see “`pbcsystems` and shortcut strings” in the PyBindingCurve documentation.

```
import numpy as np
import pybindingcurve as pbc
my_system = pbc.BindingCurve("1:1")
```

We then define the system parameters in a python dictionary, defining `p` (protein concentration) as a linear NumPy sequence from 0 to 20  $\mu\text{M}$ , `l` (ligand concentration) as 10  $\mu\text{M}$ , and the protein-ligand  $K_D$  to be 1  $\mu\text{M}$ .

```
system_parameters = {"p": np.linspace(0, 20), "l": 10, "kdp1": 1}
```

We can now add the curve to the plot. If we want multiple simulations on the same plot, then it is good to give the curve a name with the optional name parameter.

```
my_system.add_curve(system_parameters, name= "Curve 1")
```

Now we add another, higher affinity curve to the plot, defining a similar system with a lower  $K_D$  and add it to the curve.

```
system_parameters_higher_affinity = {"p": np.linspace(0, 20), "l": 10, "kdp1": 0.5}
my_system.add_curve(system_parameters_higher_affinity, name "Curve 2")
```

Finally show the plot. Optionally, title, xlabel and ylabel variables may also be passed to title the plot and axes.

```
my_system.show_plot()
```

This produces the following plot:

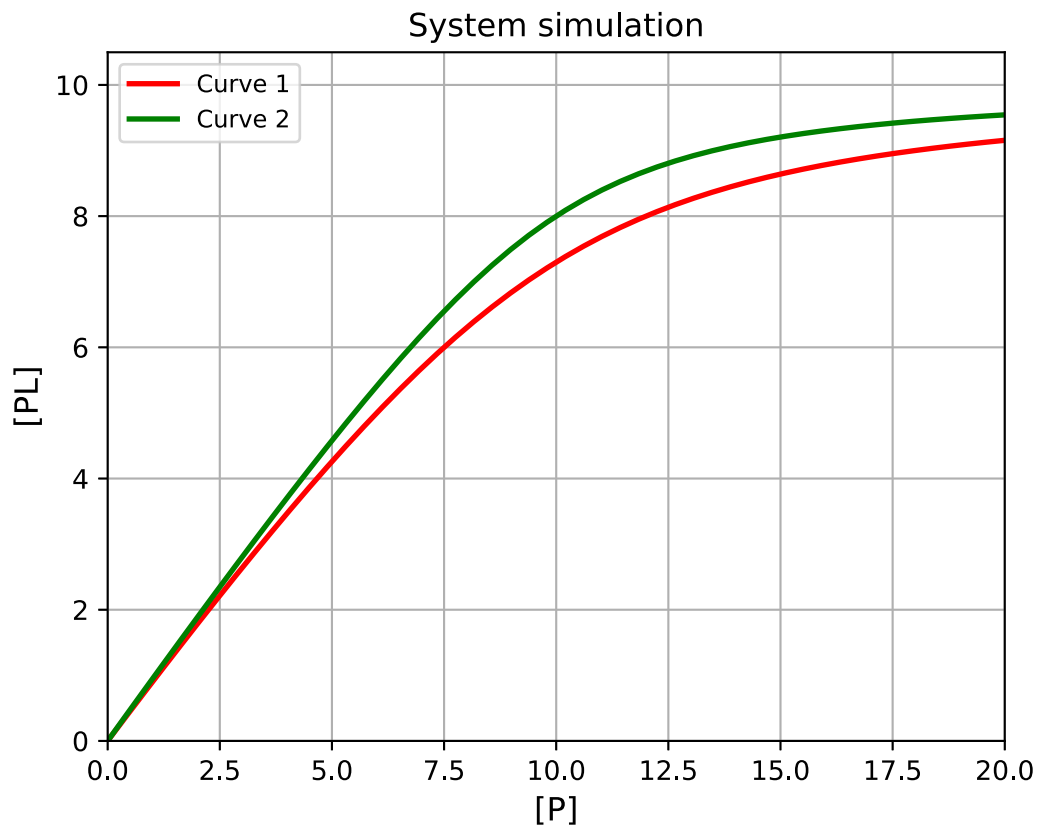

To obtain exact single points from the plot, we may call the query function of my\_system:

```
print(my_system.query({"p":5, "l":10, "kdp1":1}))
```

If a list or NumPy array is included as a system parameter, then a NumPy array of results is returned.

We may want to simulate a system in terms of a signal, not the concentration of complex. In this case, we may pass additional parameters, setting the ymax and/or ymin variables in the system parameters. Inclusion of these will scale the signal present between these values. This is very important if a detector is used with a maximum or minimum sensitivity and you wish to simulate response. Changing our system parameters to include a maximal response of 2000 units will result in subtle scale and axes changes:

```
system_parameters = {"p": np.linspace(0, 20), "l": 10, "kdp1": 1, 'ymax':2000}
system_parameters_higher_affinity = {"p": np.linspace(0, 20), "l": 10, "kdp1": 0.5,
'ymax':2000}
my_system.add_curve(system_parameters, name= "Curve 1")
my_system.add_curve(system_parameters_higher_affinity, name= "Curve 2")
my_system.show_plot()
```

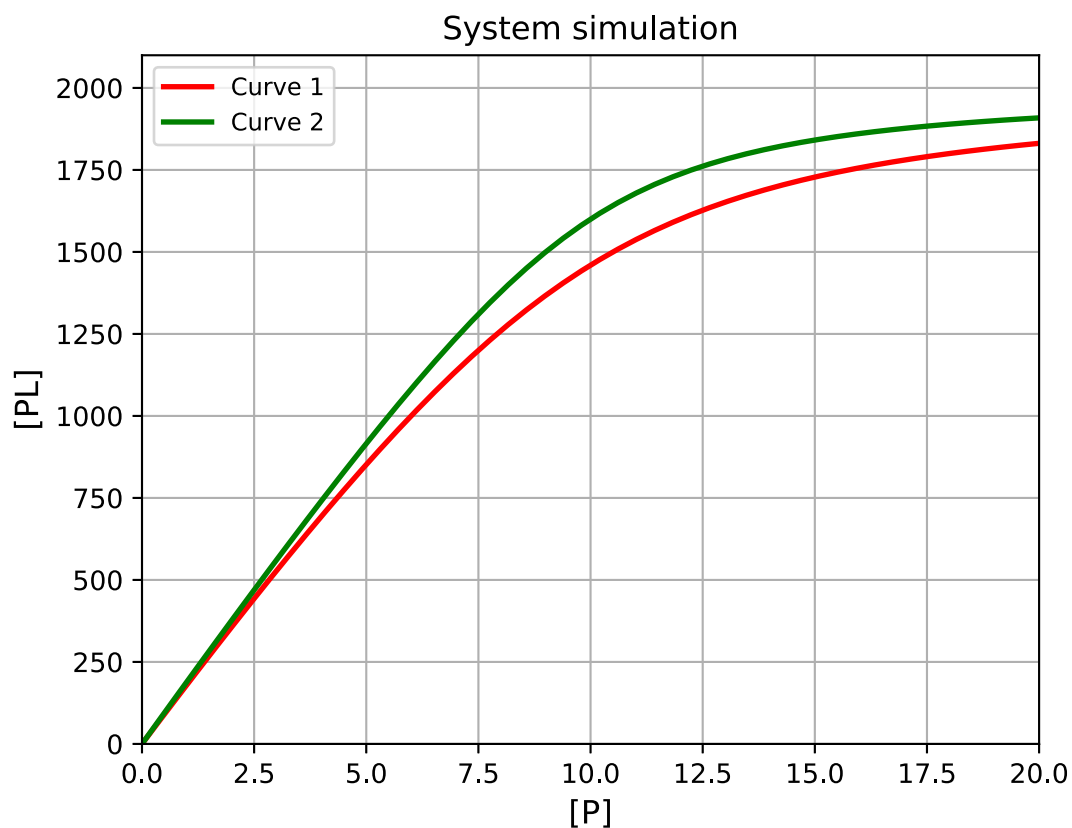

Additionally, we may transform the readout by passing a range of `pbcc.Readout` objects to `add_curve`, or `query`. To display curves as a fraction total ligand bound, we would pass `pbcc.Readout.fraction_1`. For more information on readouts, please see `pbcc.Readout` in the `PyBindingCurve` documentation. Supplying a readout overrides the automatic signal readout selection when a `ymin` or `yymax` parameter has been found in a system:

```

system_parameters = {"p": np.linspace(0, 20), "l": 10, "kdpl": 1, 'ymax':2000}
system_parameters_higher_affinity = {"p": np.linspace(0, 20), "l": 10, "kdpl": 0.5,
'ymax':2000}

my_system.add_curve(system_parameters, readout=pbcc.Readout.fraction_1)
my_system.add_curve(system_parameters_higher_affinity, readout=pbcc.Readout.fraction_1)

my_system.show_plot()

```

Results in the following:



System simulation

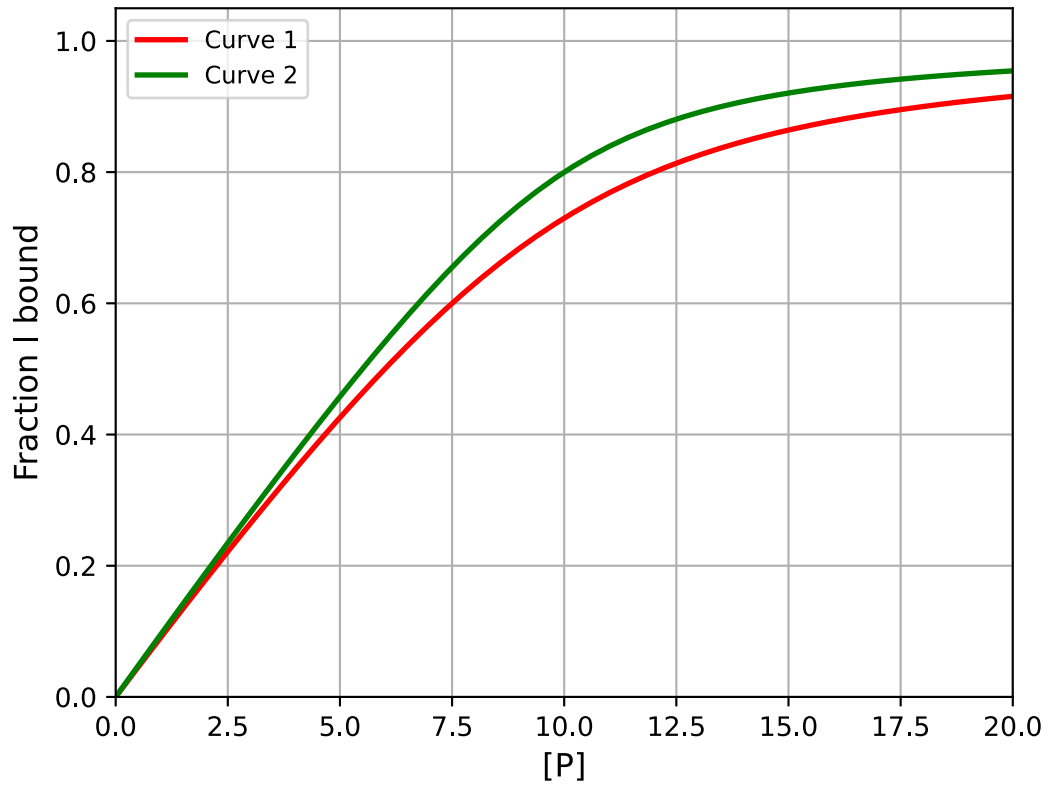

## Fitting of data to 1:1 binding

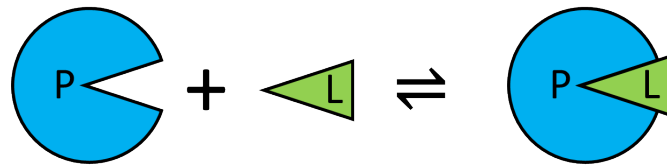

Example code is available here:

[https://github.com/stevenshave/pybindingcurve/blob/master/example\\_1to1\\_fit.py](https://github.com/stevenshave/pybindingcurve/blob/master/example_1to1_fit.py)

A titration of protein from nothing to 200  $\mu\text{M}$  into a cuvette containing 10  $\mu\text{M}$  ligand produces the following signal from the instrument:

| [P] $\mu\text{M}$ | 0    | 20    | 40    | 60    | 80    | 100   | 120   | 140   | 160   | 180    | 200   |
|-------------------|------|-------|-------|-------|-------|-------|-------|-------|-------|--------|-------|
| Signal            | 54.4 | 483.2 | 636.7 | 709.3 | 798.7 | 900.5 | 907.9 | 890.6 | 901.0 | 1004.6 | 922.5 |

We may easily fit this data using PBC and obtain two values... the  $K_D$  of the complex, as well as the maximal signal ( $y_{\text{max}}$ ) achievable with the system.

We first import PBC and Numpy:

```
import numpy as np
import pybindingcurve as pbc
```

Next we create NumPy arrays to hold our protein concentration and signal:

```
xcoords = np.array([0.0, 20.0, 40.0, 60.0, 80.0, 100.0, 120.0, 140.0, 160.0, 180.0,
200.0])
ycoords = np.array([54.4, 483.2, 636.7, 709.3, 798.7, 900.5, 907.9, 890.6, 901.0, 1004.6,
922.5])
```

We now define a PBC BindingCurve object governed by the 1:1 binding system, and add the experimental data to PBC's internal plot using the `add_scatter` function of the returned BindingCurve object:

```
my_system = pbc.BindingCurve("1:1")
my_system.add_scatter(xcoords, ycoords)
```

When simulating a curve, we define a system with all parameters required to fully describe the simulation. In this case, we know four things; the amount of protein in the system (`xcoords`), the concentration of ligand present, the minimal signal, and finally the response. We supply the amount of protein and ligand, along with the known minimum signal for no protein being present (calculated by calling `np.min` on `ycoords`), and not yet the response to define the system which will be supplied as an argument to the fitting function in the next code segment:

```
system_parameters = {"p": xcoords, "l": 10, "ymin": np.min(ycoords)}
```

We then perform the fit, capturing two pieces of data; the fitted system (a dictionary of system parameters best describing the system) and the fit accuracy data. The call to `PBC.BindingCurve.fit` takes the known system parameters, followed by the unknown system parameters, and finally the signal data which we are fitting to. Unknown system parameters are passed in a dictionary, much like the system parameters, but their assigned value is only used as a starting point guess for the fitting

routines and can normally be set to any value. A reasonable guess at the true value, however, is good practice. Inclusion of either `ymin` or `ymax` as either a known, or unknown system parameters allows PBC to infer that we are fitting to a signal, not an absolute, known complex concentration:

```
fitted_system, fit_accuracy = my_system.fit(system_parameters, {"kdpl": 0, "ymax":1000},
ycoords)
```

We may now print out the fitted parameters, along with the accuracy of the parameters. Internally, PBC utilizes the `lmfit` package to return fitted parameters along with a true fit accuracy, specifying a range within which we are 95% certain that the true value is within:

```
for k, v in fit_accuracy.items():
    print(f"Fit: {k}={fitted_system[k]} +/- {v}")
```

Running the above code results in the following output:

```
Fit: kdpl=24.720148154934403 +/- 3.800620728975203
Fit: ymax=1072.308288861583 +/- 34.03937019626566
```

Indicating that the system's KD is 24.72 +/- 3.8  $\mu$ M.

To visualize how well this fit describes the experimental data, we can use the returned system parameters to plot a curve over the scatter data already added to the `pbcbindingcurve` object's internal plot. However, the returned system object currently looks like this:

```
{'p': array([ 0., 20., 40., 60., 80., 100., 120., 140., 160., 180., 200.]), 'l': 10,
'xmin': 54.4, 'kdpl': 24.720148154934403, 'ymax': 1072.308288861583}
```

Simulating and plotting such a system would produce a plot with only 11 points along the x-axis and would not look correct. We therefore increase the number of points present for protein concentration with the following command:

```
fitted_system["p"] = np.linspace(0, np.max(xcoords))
```

We may then add the curve to the plot and visualize the result.

```
my_system.add_curve(fitted_system)
my_system.show_plot()
```

Resulting in the following:

System simulation

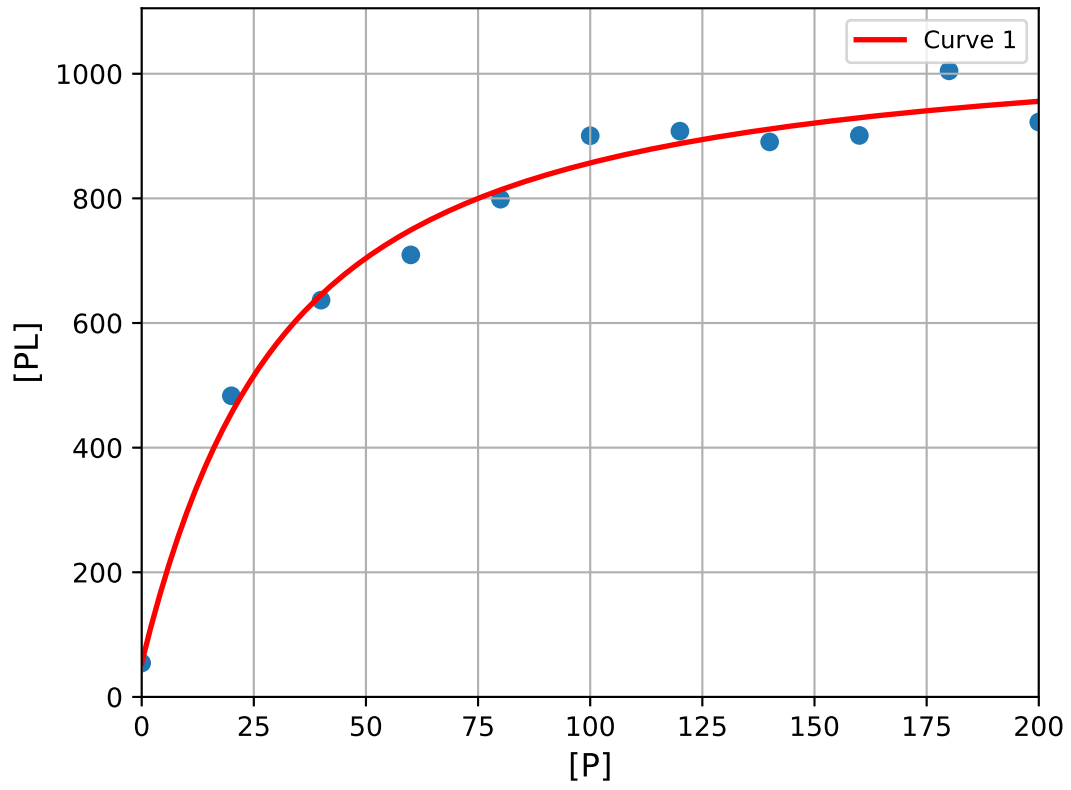

## 1:1:1 competition simulation

Competition is often used in assays, utilizing displacement of a labelled ligand by new inhibitor to detect competitive binding and displacement of the label. Example code is available here:

[https://github.com/stevenshave/pybindingcurve/blob/master/example\\_competition\\_simulation.py](https://github.com/stevenshave/pybindingcurve/blob/master/example_competition_simulation.py)

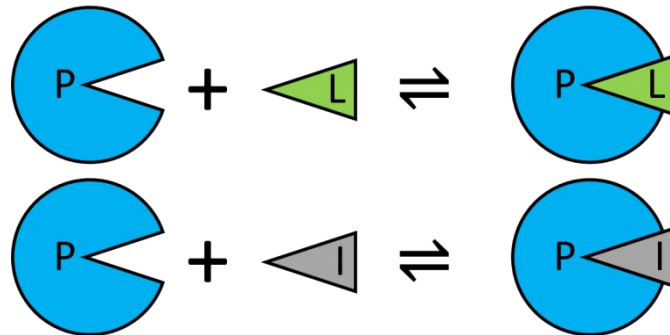

First perform imports:

```
import numpy as np
import pybindingcurve as pbc
```

We can choose to work in a common unit, typically nM, or  $\mu\text{M}$ , as long as all numbers are in the same unit, the result is valid. We assume  $\mu\text{M}$  for all concentrations bellow.

Create the PBC BindingCurve object, governed by a 'competition' system.

```
my_system = pbc.BindingCurve("competition")
```

First, let's simulate a curve with no inhibitor present (essentially 1:1)

```
my_system.add_curve(p": np.linspace(0, 40, 20), "l": 10, "i": 0, "kdpi": 1, "kdpl": 10},
                    "No inhibitor")
```

Add curve with inhibitor (i)

```
my_system.add_curve(
    {"p": np.linspace(0, 40, 20), "l": 10, "i": 10, "kdpi": 1, "kdpl": 10}, "[i] = 10  $\mu\text{M}$ "
)
```

Add curve with more inhibitor (i)

```
my_system.add_curve(
    {"p": np.linspace(0, 40, 20), "l": 10, "i": 25, "kdpi": 1, "kdpl": 10}, "[i] = 25  $\mu\text{M}$ "
)
```

Display the plot:

```
my_system.show_plot()
```

Which results in the following:

System simulation

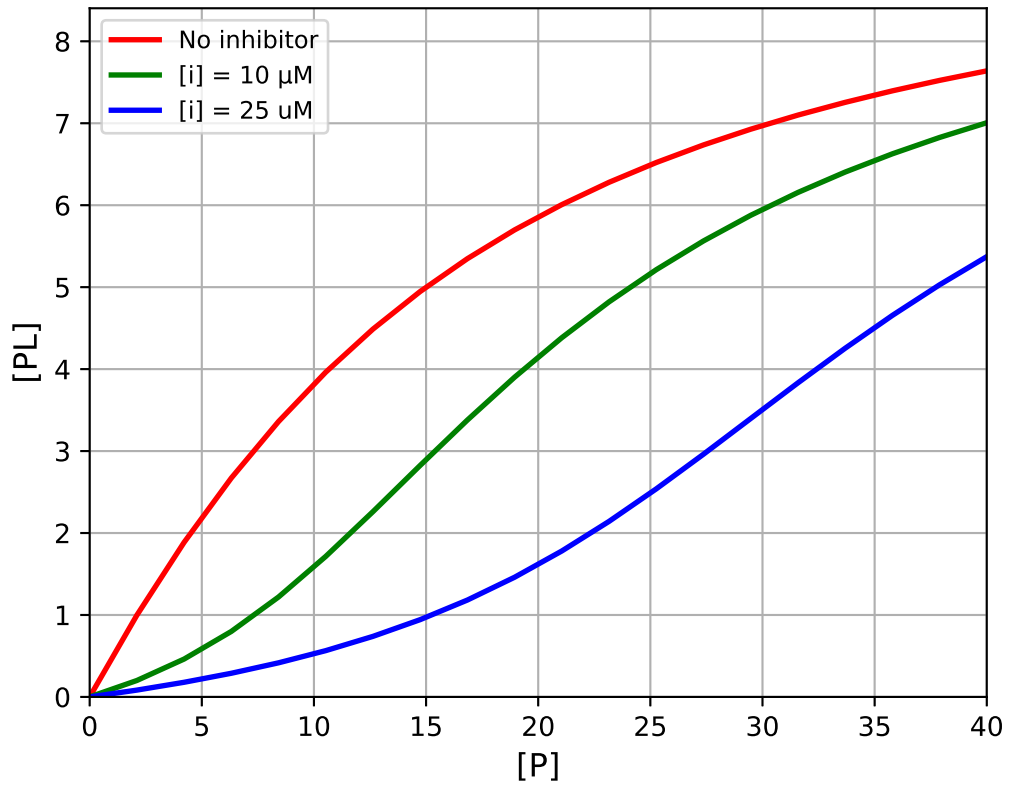

Fitting to 1:1:1 competition

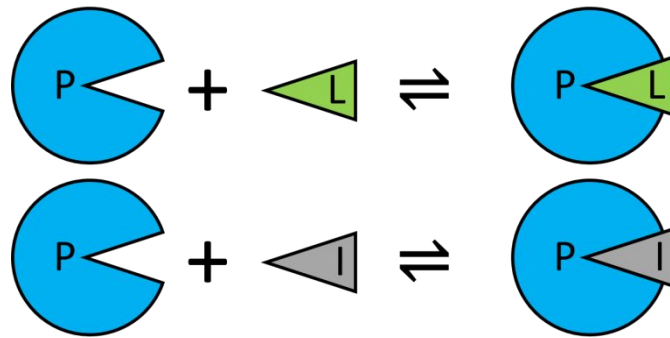

Using experimental competition data, we may obtain system parameters, such as inhibitor  $K_D$ . Example code is available here:

[https://github.com/stevenshave/pybindingcurve/blob/master/example\\_competition\\_fit.py](https://github.com/stevenshave/pybindingcurve/blob/master/example_competition_fit.py)

Perform the standard imports:

```
import numpy as np
import pybindingcurve as pbc
```

We can choose to work in a common unit, typically nM, or  $\mu\text{M}$ , as long as all numbers are in the same unit, the result is valid. We assume  $\mu\text{M}$  for all concentrations bellow.

Define experimental data:

```
xcoords = np.array([0.0, 4.2, 8.4, 16.8, 21.1, 31.6, 35.8, 40.0])
ycoords = np.array([150, 330, 1050, 3080, 4300, 6330, 6490, 6960])
```

Construct the PyBindingCurve object, operating on a 1:1:1 (competition) system and add experimental data to the plot:

```
my_system = pbc.BindingCurve("1:1:1")
my_system.add_scatter(xcoords, ycoords)
```

Known system parameters,  $k_{dpl}$  will be added to this by fitting:

```
system_parameters = {"p": xcoords, "l": 10, "i": 10, "kdpl": 10}
```

Now we call fit, passing the known parameters, followed by a dict of parameters to be fitted along with an initial guess, pass the ycoords, and what the readout (ycoords) is:

```
fitted_system, fit_accuracy = my_system.fit(system_parameters, {"kdpi": 0}, ycoords)
```

Print out the fitted parameters:

```
for k, v in fit_accuracy.items():
    print(f"Fit: {k}={fitted_system[k]} +/- {v}")
```

Assign more points to 'p' to make a smooth plot:

```
fitted_system["p"] = np.linspace(0, np.max(xcoords))
```

Add a new curve, simulated using fitted parameters to our BindingCurve object and show the plot:

```
my_system.add_curve(fitted_system)
my_system.show_plot()
```

Which results in the following output and plot:

```
Fit: kdpi=0.44680894202996824 +/- 0.10384753604598472
Fit: ymax=9920.875421523158 +/- 98.92963212643627
```

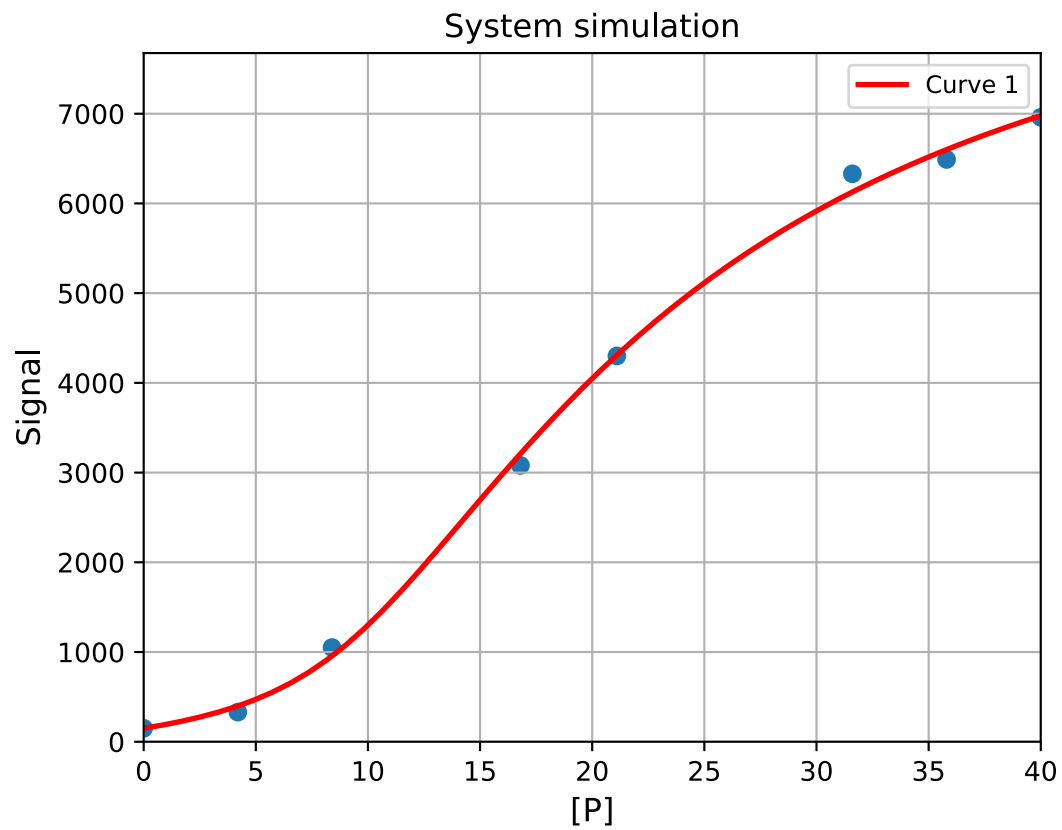



## Homodimer formation simulation

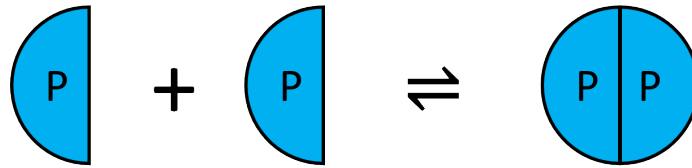

Homodimer formation is a very simple, with only one species present, two units of which bind together to make one of a new species (dimer). Dissociation of the dimer then makes two monomers. Example code is available here:

[https://github.com/stevenshave/pybindingcurve/blob/master/example\\_homodimer\\_formation\\_simulation.py](https://github.com/stevenshave/pybindingcurve/blob/master/example_homodimer_formation_simulation.py)

First, we perform the standard imports:

```
import numpy as np
import pybindingcurve as pbc
```

Define our system, homodimer formation has only p (protein, or monomer concentration) and kdpp (the dissociation constant of the dimer). We can choose to work in a common unit, typically nM, or  $\mu\text{M}$ , as long as all numbers are in the same unit, the result is valid. We assume  $\mu\text{M}$  for all concentrations below:

```
system_parameters = {"p": np.linspace(0, 10), "kdpp": 10}
```

Make a pbc BindingCurve defined by the 'homodimer formation' binding system:

```
my_system = pbc.BindingCurve("homodimer formation")
```

We can now add the curve to the plot and show it:

```
my_system.add_curve(system_parameters)
my_system.show_plot()
```

This produces the following simulation plot of the theoretical experiment. It is theoretical as monomer is titrated in, with no dimer present, something not achievable, although it could be done in reverse.

System simulation

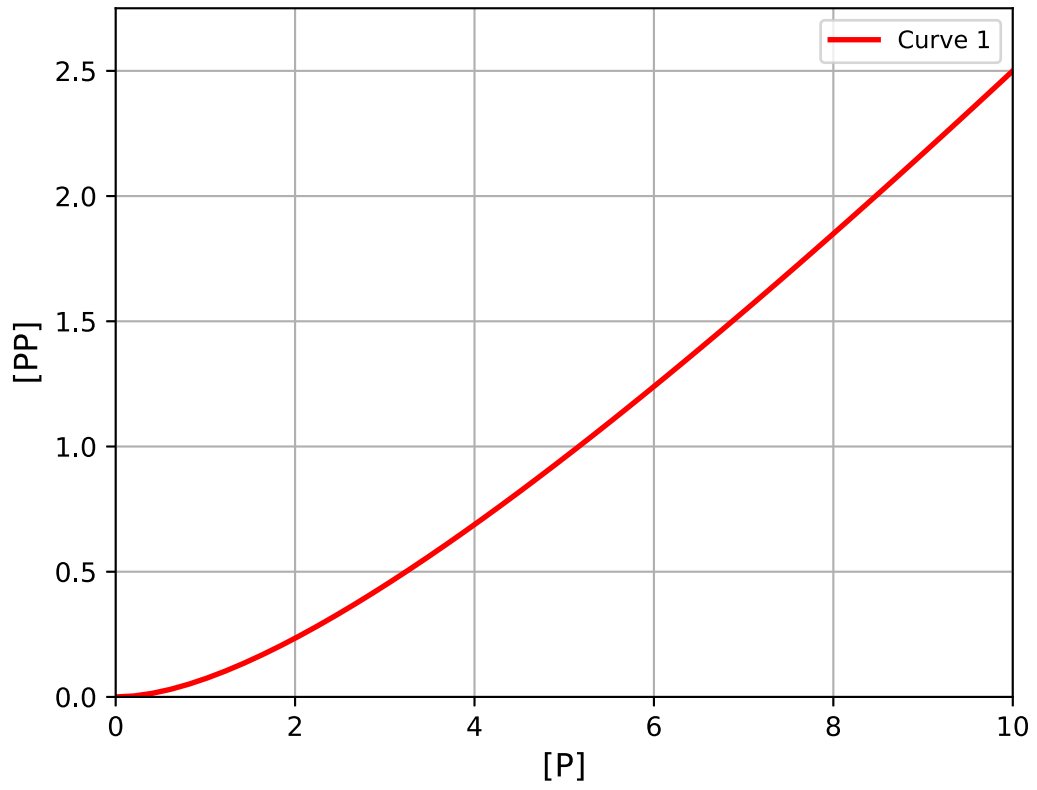

## Fitting to homodimer formation



Using experimental competition data, we may obtain system parameters, such as dimerization  $K_D$ . Example code is available here:

[https://github.com/stevenshave/pybindingcurve/blob/master/example\\_homodimer\\_formation\\_fit.py](https://github.com/stevenshave/pybindingcurve/blob/master/example_homodimer_formation_fit.py)

Perform the standard imports:

```
import numpy as np
import pybindingcurve as pbc
```

We can choose to work in a common unit, typically nM, or  $\mu\text{M}$ , as long as all numbers are in the same unit, the result is valid. We assume  $\mu\text{M}$  for all concentrations bellow.

We define the known experimental data bellow:

```
xcoords = np.array([0.0,2,4,6,8,10])
ycoords = np.array([0., 0.22, 0.71, 1.24,1.88,2.48])
```

Construct the PyBindingCurve object, operating on a homodimer formation system and add experimental data to the plot:

```
my_system = pbc.BindingCurve("homodimer formation")
my_system.add_scatter(xcoords, ycoords)
```

Known system parameters, kdpp will be added to this by fitting:

```
system_parameters = {"p": xcoords}
```

Now we call fit, passing the known parameters, followed by a dict of parameters to be fitted along with an initial guess, pass the ycoords, and what the readout (ycoords) is:

```
fitted_system, fit_accuracy = my_system.fit(system_parameters, {"kdpp": 0}, ycoords)
```

Print out the fitted parameters:

```
for k, v in fit_accuracy.items():
    print(f"Fit: {k}={fitted_system[k]} +/- {v}")
```

Producing:

```
Fit: kdpp=9.939776196471206 +/- 0.15729785759220752
```

Assign more points to 'p' to make a smooth plot:

```
fitted_system["p"] = np.linspace(0, np.max(xcoords))
```

Add a new curve, simulated using fitted parameters to our BindingCurve object and show the plot:

```
my_system.add_curve(fitted_system)  
my_system.show_plot()
```

Producing:

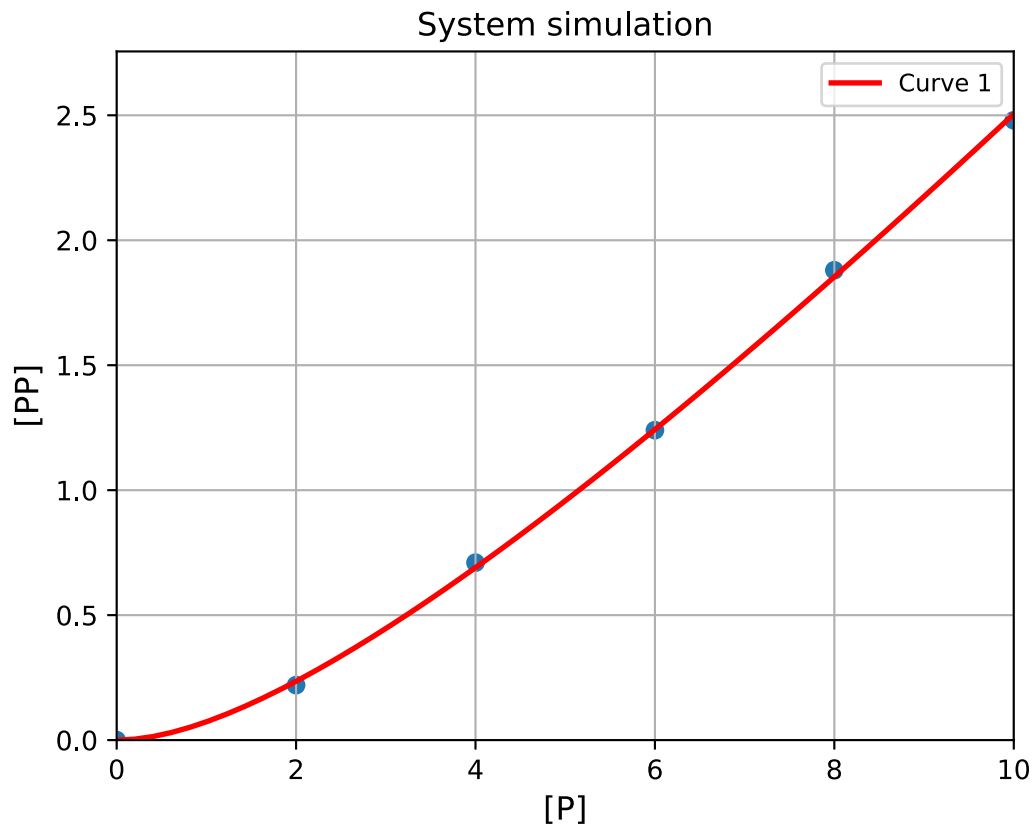

## Homodimer breaking simulation

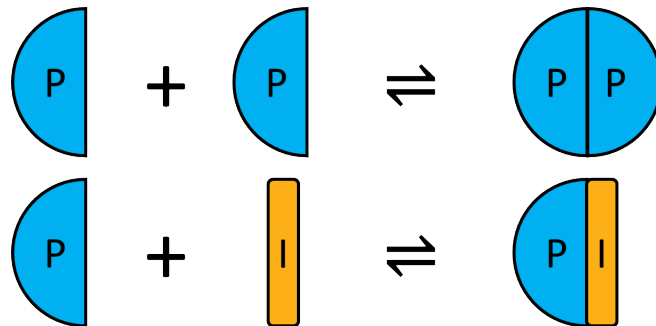

Homodimer breaking is like a competition experiment, however breaking of the dimer results in two monomers. Example code is available here:

[https://github.com/stevenshave/pybindingcurve/blob/master/example\\_homodimer\\_formation\\_simulation.py](https://github.com/stevenshave/pybindingcurve/blob/master/example_homodimer_formation_simulation.py)

First, we perform the standard imports:

```
import numpy as np
import pybindingcurve as pbc
```

We can choose to work in a common unit, typically nM, or  $\mu\text{M}$ , as long as all numbers are in the same unit, the result is valid. We assume  $\mu\text{M}$  for all concentrations below. Define out homodimer breaking system, titrating in inhibitor:

```
system_parameters = {"p": 30, "kdpp": 10, "i": np.linspace(0,60), "kdpi": 1}
```

Create the PBC BindingCurve object, expecting a 'homodimer breaking' system:

```
my_system = pbc.BindingCurve("homodimer breaking")
```

Add the system to PBC, generating a plot and display it:

```
my_system.add_curve(system_parameters)
my_system.show_plot()
```

Resulting in:

System simulation

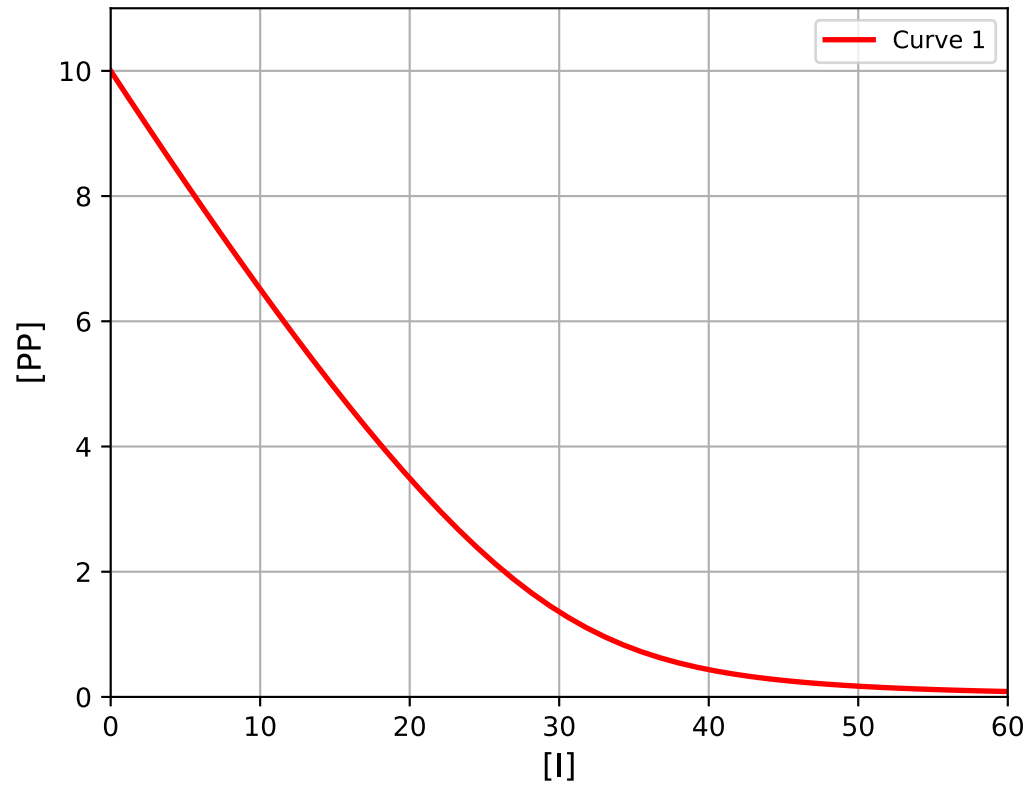

## Fitting to homodimer breaking



Using experimental competition data, we may obtain system parameters, such as dimerization  $K_D$ . Example code is available here:

[https://github.com/stevenshave/pybindingcurve/blob/master/example\\_homodimer\\_formation\\_fit.py](https://github.com/stevenshave/pybindingcurve/blob/master/example_homodimer_formation_fit.py)

Perform the standard imports:

```
import numpy as np
import pybindingcurve as pbc
```

We can choose to work in a common unit, typically nM, or  $\mu\text{M}$ , as long as all numbers are in the same unit, the result is valid. We assume  $\mu\text{M}$  for all concentrations bellow.

Define experimental data:

```
xcoords = np.array([0.0, 16.7, 33.3, 50.0, 66.7, 83.3, 100.0])
ycoords = np.array([0.0, 0.004, 0.021, 0.094, 0.312, 1.188, 3.854])
```

Construct the PyBindingCurve object, operating on a homodimer breaking system and add experimental data to the plot:

```
my_system = pbc.BindingCurve("homodimerbreaking")
my_system.add_scatter(xcoords, ycoords)
```

Known system parameters,  $K_D$  will be added to this by fitting:

```
system_parameters = {"p": xcoords, "i": 100, "kdpp": 10}
```

Now we call fit, passing the known parameters, followed by a dict of parameters to be fitted along with an initial guess, pass the ycoords, and what the readout (ycoords) is:

```
fitted_system, fit_accuracy = my_system.fit(system_parameters, {"kdpi": 0}, ycoords)
```

Print out the fitted parameters:

```
for k, v in fit_accuracy.items():
    print(f"Fit: {k}={fitted_system[k]} +/- {v}")
```

Assign more points to 'p' to make a smooth plot:

```
fitted_system["p"] = np.linspace(0, np.max(xcoords))
```

Add a new curve, simulated using fitted parameters to our BindingCurve object and display the plot:

```
my_system.add_curve(fitted_system)
my_system.show_plot()
```

Resulting in:

Fit:  $k_{dpi}=1.0024780308947485 \pm 0.001698935583536732$

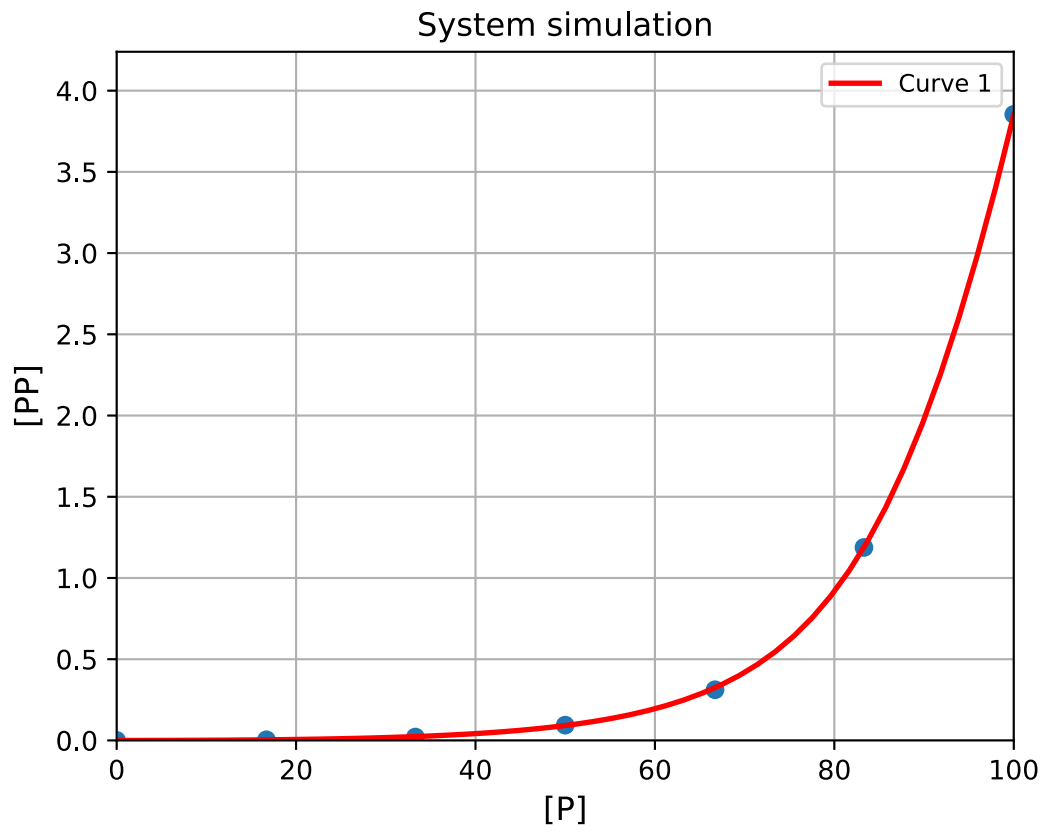



## Simulation of custom binding systems

### Custom binding system example 1

```
custom_system = """
    P+P<->PP*
    P+L<->PL
    PP+L<->PPL1
    PP+L<->PPL2
    PPL1+L<->PPL1L2
    PPL2+L<->PPL1L2
    """
```

Example code is available here:

[https://github.com/stevenshave/pybindingcurve/blob/master/example\\_custom\\_binding\\_system.py](https://github.com/stevenshave/pybindingcurve/blob/master/example_custom_binding_system.py)

PyBindingCurve is able to write custom functions representing a binding system from very simple system definition strings. This allows the simple definition, solving, plotting and fitting to any custom system.

We define these custom systems as simple strings with reactions separated either on newlines, commas, or a combination of the two. Reactions take the form:

- $r1+r2 \rightleftharpoons p$

Denoting reactant1 + reactant2 form p.

PBC will generate equations representing the custom system and use root finding techniques to calculate species concentrations at equilibrium. Readouts are signified by inclusion of a star (\*) on a species. If no star is found, then the first seen product is

used. Some system examples follow:- "P+L<->PL" - standard protein-ligand binding

- "P+L<->PL, P+I<->PI" - competition binding

- "P+P<->PP" - dimer formation (default readout on PP - dimer)

- "P\*+P<->PP" - dimer formation (readout specified on P - monomer)

- "monomer+monomer<->dimer" - dimer formation (default readout on PP)

- "P+L<->PL1, P+L<->PL2, PL1+L<->PL1L2, PL2+L<->PL1L2" - 1:2 site binding

$K_D$ s passed to custom systems use underscores to separate species. P+L<->PL would require the  $K_D$  passed as  $kd\_p\_l\_pl$ . Running with incomplete system parameters will prompt for the correct ones. All species and  $K_D$ s are cast to lower-case, simplifying parameter passing.

We can choose to work in a common unit, typically nM, or  $\mu$ M, as long as all numbers are in the same unit, the result is valid. We assume  $\mu$ M for all concentrations and  $K_D$ s below.

To simulate a highly complex system, where protein binds to ligand, but protein can dimerize, while protein dimer binds to an inhibitor, and the protein dimer has can bind a single ligand, and our readout is on the protein monomer bound to ligand, we would define the system as follows:

```
custom_system="""
P+L<->PL*
P+P<->PP
PP+I<->PPI
PPI+L<->PPIL
"""
```

We can simulate this system in Python as follows:

```
import numpy as np
import pybindingcurve as pbc
custom_system="""
P+L<->PL*
P+P<->PP
PP+I<->PPI
PPI+L<->PPIL
"""
my_system = pbc.BindingCurve(custom_system)
```

We then define the system parameters in a python dictionary.

```
system_parameters = {
    'p': np.linspace(0,5),
    'l':0.5,
    'i':4.0,
    'kd_p_l_pl':4.3,
    'kd_p_p_pp':1.2,
    'kd_pp_i_ppi':1.2,
    'kd_ppi_l_ppil':0.2,
}
```

We can now add the curve to the plot. If we want multiple simulations on the same plot, then it is good to give the curve a name with the optional name parameter.

```
my_system.add_curve(system_parameters, name= "Curve 1")
```

Finally show the plot. Optionally, title, xlabel and ylabel variables may also be passed to title the plot and axes.

```
my_system.show_plot()
```

This produces the following plot:

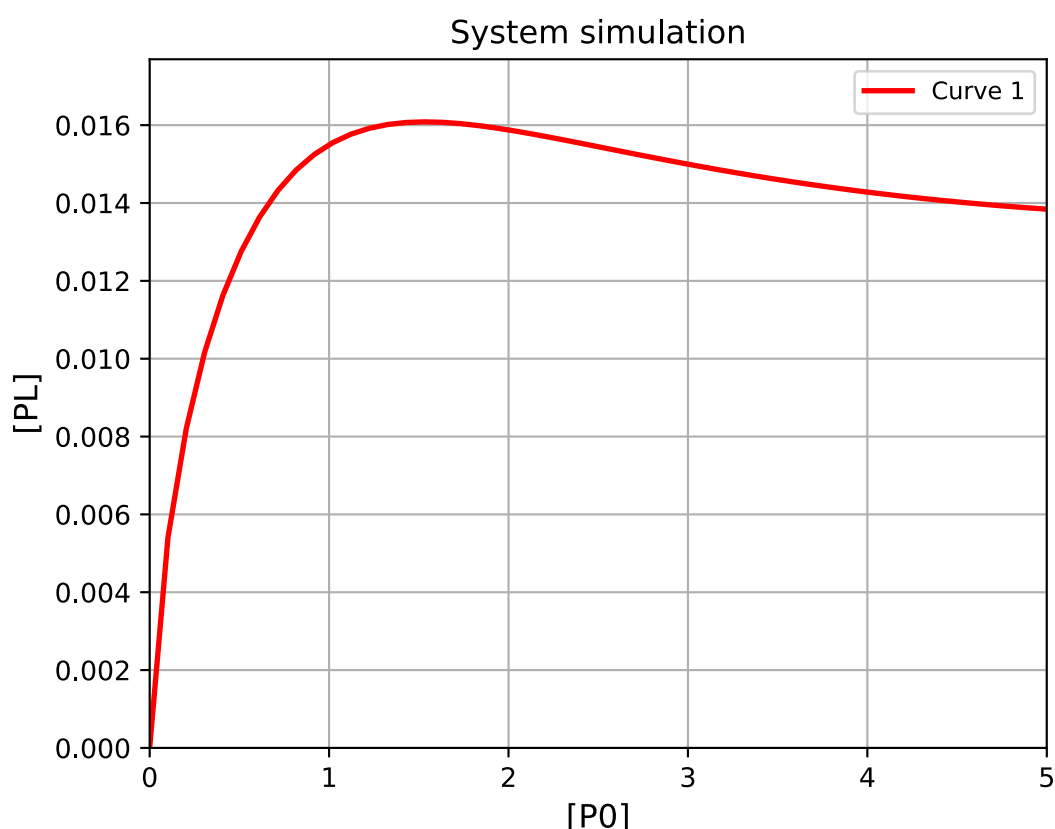

To obtain exact single points from the plot, we may call the query function of my\_system.

If a list or NumPy array is included as a system parameter, then a NumPy array of results is returned.

We may want to simulate a system in terms of a signal, not the concentration of complex. In this case, we may pass additional parameters, setting the ymax and/or ymin variables in the system parameters. Inclusion of these will scale the signal present between these values. This is very important if a detector is used with a maximum or minimum sensitivity and you wish to simulate response.

### *Custom binding system example 2*

In 2020, Han<sup>1</sup> published a paper describing the treatment of ternary complex formation and provided Excel workbooks capable of simulating these systems using a kinetic approach [1].

1. Han, B., A suite of mathematical solutions to describe ternary complex formation and their application to targeted protein degradation by heterobifunctional ligands. *Journal of Biological Chemistry* **2020**, 295 (45), 15280-15291.

We exemplify the simplicity and power of PyBindingCurve custom system definitions by simulating the complex formation of Cdc34-Cc0651-Ubiquitin. The interaction of the E2 enzyme Cdc34 with Ubiquitin is stabilized by the small molecule Cc0651. A flow of binding events can be seen below, with Cdc34 denoted as 'P', the compound Cc0651 as 'C', and Ubiquitin as 'U'. Interaction affinities are a combination of estimated and experimental values taken from literature <sup>2</sup>.

2. Huang, H.; Ceccarelli, D. F.; Orlicky, S.; St-Cyr, D. J.; Ziemba, A.; Garg, P.; Plamondon, S.; Auer, M.; Sidhu, S.; Marinier, A., E2 enzyme inhibition by stabilization of a low-affinity interface with ubiquitin. Nature chemical biology 2014, 10 (2), 156-163.

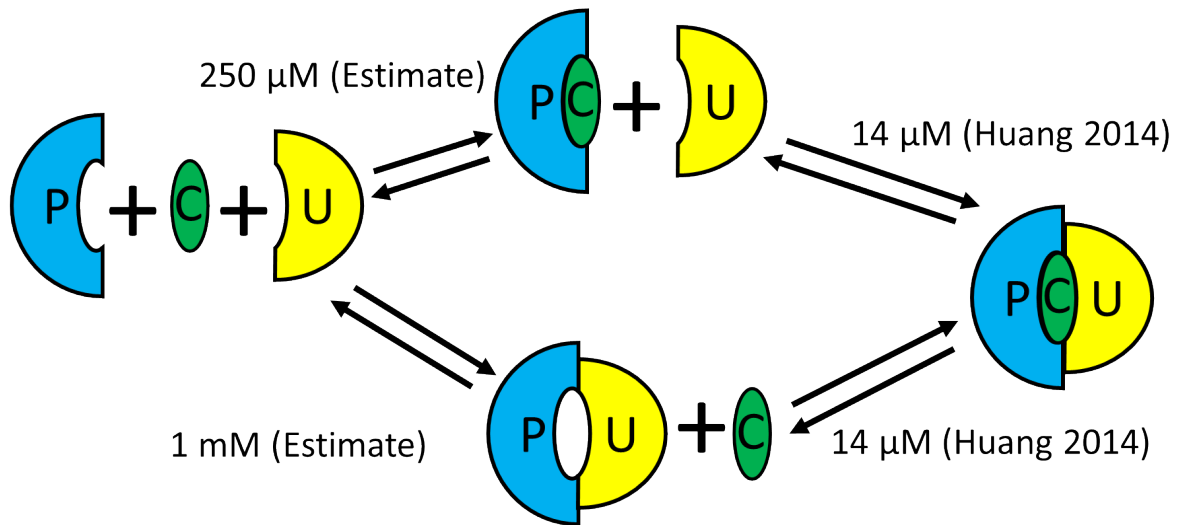

We may define the system using the PyBindingCurve simple custom system nomenclature. Not the star against the final PCU product, denoting that the readout should be PCU:

```
custom_system="""
P+C<->PC
P+U<->PU
PC+U<->PCU
PU+C<->PCU*
"""
```

Example code is available here:

[https://github.com/stevenshave/pybindingcurve/blob/master/example\\_custom\\_binding\\_system2.py](https://github.com/stevenshave/pybindingcurve/blob/master/example_custom_binding_system2.py)

We can simulate this system in Python as follows:

```
import numpy as np
import pybindingcurve as pbc

# Define the custom system

custom_system="""
P+C<->PC
P+U<->PU
PC+U<->PCU
PU+C<->PCU*
"""
```

We then define the PBC object and system parameters in a python dictionary.

```
my_system = pbc.BindingCurve(custom_system)
system_parameters = {
    'p': 5,
```

```
'c':np.linspace(0,200),  
'u':50,  
'kd_p_c_pc':250,  
'kd_pc_u_pcu':14,  
'kd_p_u_pu':1000,  
'kd_pu_c_pcu':14  
}
```

We can now add the curve to the plot. If we want multiple simulations on the same plot, then it is good to give the curve a name with the optional name parameter.

```
my_system.add_curve(system_parameters, name= "Curve 1")
```

Finally show the plot. Optionally, title, xlabel and ylabel variables may also be passed to title the plot and axes.

```
my_system.show_plot()
```

This produces the following plot:

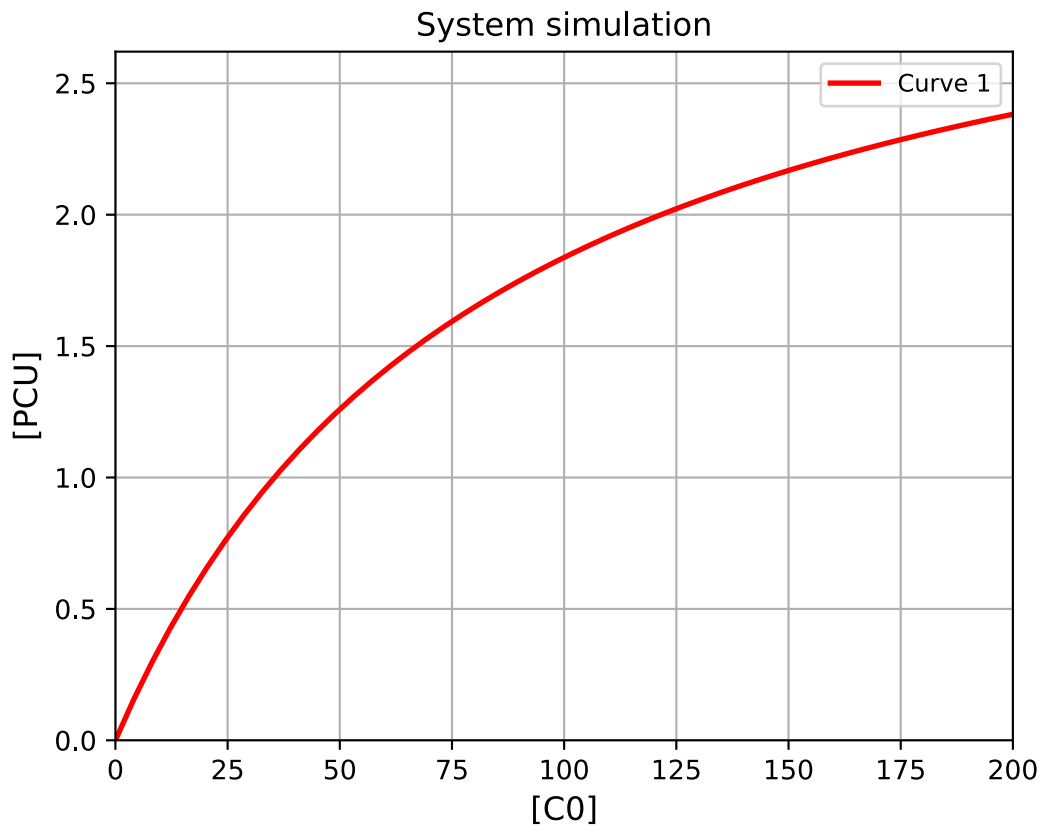

## Documentation and API

Full PyBindingCurve source code can be found here: <https://github.com/stevenshave/pybindingcurve>

Conventionally, the standard import utilized in a run of PyBindingCurve (PBC) are defined as follows:

```
import pybindingcurve as pbc
import numpy as np
```

PyBindingCurve is imported with the short name 'pbc', and then NumPy as 'np' to enable easy specification of ranged system parameters, evenly spaced across intervals mimicking titrations.

Next, we initialize a PBC BindingCurve object. Upon initialization, either a string or BindingSystem object is used to define the system to be simulated. Simple strings such as "1:1", "competition", "homodimer breaking" can be used as an easy way to define the type of binding system that should be mathematically modelled. See the list of available system shortcut strings bellow in the 'pbc.systems and shortcut strings' section bellow. Custom objects may also be created of type pybindingcurve.BindingSystem, of which there exist a large choice within PyBindingCurve, or the user may create a custom BindingSystem to initialize PBC objects:

```
my_system=pbc.BindingCurve("1:1")
```

There are three main modes of operation within PyBindingCurve; 1) Visualization of protein-ligand behavior within a titration, simulating a range of conditions. 2) Simulation of a single system state with discrete parameters. 3) Fitting of experimental data. A description of these follows:

1. Simulation with visualization: pass a dictionary containing system parameters to the add\_curve function of the BindingCurve object (my\_system). Required system parameters depend on the system being modelled. In the case of 1:1 binding, we require p (protein concentration), l (ligand concentration), kdpl (dissociation constant between p and l), and optionally, a ymax and/or ymin variable if dealing with simulation of a signal. add\_curve expects one changing parameter, which will be the x-axis. By default, complex concentration will be the readout of a system, but that can be changed by passing different readout options to add\_curve. See the 'pbc.Readout' section bellow for further information. With one curve added, we can add more curves, or simply display the plot by calling the show\_plot function.

```
system_parameters={'p':np.linspace(0,20), 'l':20, 'kdp1':10}
my_system.add_curve(system_parameters)
my_system.show_plot()
```

2. Single point simulation: if you require not a simulation with a curve, but a single point with set concentrations and  $K_D$ s, then query may be called with a dictionary of system parameters and data returned. Additionally, if the dictionary contains a NumPy array, representing a titration (for example, the system parameters above), then a NumPy array of the readout is returned instead of a single value:

```
complex_conc = my_system.query({'p':10, 'l':20, 'kdp1':10})
```

3. Fit experimental data to a system to obtain experimental parameters, such as  $K_D$ . A common situation is determining  $K_D$  from measurements obtained from experimental data. We can perform this as follows, with x- and y-coordinates, we add the experimental points to the plot, define system parameters that we do know (protein concentrations, and the amount of ligand),

and then call fit on the system passing in parameters to fit and an initial guess (1), along with the known parameters. We then iterate and print the fitted parameters.

```
xcoords = np.array([0.0, 20.0, 40.0, 60.0, 80.0, 100.0, 120.0, 140.0, 160.0, 180.0,
200.0])
ycoords = np.array([0.544, 4.832, 6.367, 7.093, 7.987, 9.005, 9.079, 8.906, 9.010,
10.046, 9.225])
my_system.add_scatter(xcoords, ycoords)
system_parameters = {"p": xcoords, "l": 10}
fitted_system, fit_accuracy = my_system.fit(system_parameters, {"kdp1": 1}, ycoords)
for k, v in fit_accuracy.items():
    print(f"Fit: {k}={fitted_system[k]} +/- {v}")
```

## pbcbindingcurve.BindingCurve

The BindingCurve object allows the user to work with a specific system, supplying tools for simulation and visualization (plotting), querying of single point values, and fitting of experimental parameters to observation data.

### Initialization

When initializing this main class of PBC, we may supply either a pbcbindingcurve.BindingSystem, a human readable shortcut string such as “1:1”, “competition”, “homodimer formation”, etc., or a system definition string. For a full list of systems, shortcuts, and custom systems definition strings, please refer to the ‘pbcbindingcurve.systems and shortcut strings’ section.

Initialization of a BindingCurve object takes the following arguments:

```
"""
    BindingCurve class, used to simulate systems

    BindingCurve objects are governed by their underlying system, defining the
    (usually) protein-ligand binding system being represented. It also
    provides the main interface for simulation, visualisation, querying and
    the fitting of system parameters.

    Parameters
    -----
    binding_system : BindingSystem or str
        Define the binding system which will govern this BindingCurve object.
        Can either be a BindingSystem object, a shortcut string describing a
        system (such as '1:1' or 'competition', etc), or a custom binding
        system definition string.
"""
```

Once initialized with a pbcbindingcurve.BindingSystem, we may perform the following utilizing its member functions.

### add\_curve

The add curve function is the main way of simulating a binding curve with PBC. Once a BindingCurve object is initialized,

```
add_curve(parameters, name = None, readout = None)
"""
    Add a curve to the plot

    Add a curve as specified by the system parameters to the
    pbcbindingcurve.BindingSystem's internal plot using the underlying binding system
    specified on intitialisation.

    Parameters
    -----
    parameters : dict
        Parameters defining the system to be simulated
    name : str or None, optional
        Name of curve to appear in plot legends
    readout : Readout.function, optional
        Change the system readout to one described by a custom readout
        function. Predefined standard readouts can be found in the static
        pbcbindingcurve.Readout class.
"""
```

### query

When simulation with visualization (plotting) is not required, we can use the query function to interrogate a system, returning either singular values, or arrays of values if one of the input parameters is an array or list.



```

query(self, parameters, readout: Readout = None):
    """
    Query a binding system

    Get the readout from from a set of system parameters

    Parameters
    -----
    parameters : dict
        System parameters defining the system being queried. Will usually
        contain protein, ligand etc concentrations, and KDs
    readout : func or None
        Change the readout of the system, can be None for unmodified
        (usually complex concentration), a static member function from
        the pbc.Readout class, or a custom written function following the
        the same definition as those in pbc.Readout.

    Returns
    -----
    Single floating point, or array-like
        Response/signal of the system
    """

```

### *fit*

With a system defined, we may fit experimental data to the system.

```

def fit(self, system_parameters: dict, to_fit: dict, ycoords: np.array, bounds: dict =
None):
    """Fit the parameters of a system to a set of data points

    Fit the system to a set of (usually) experimental datapoints.
    The fitted parameters are stored in the system_parameters dict
    which may be accessed after running this function. It is
    possible to fit multiple parameters at once and define bounds
    for the parameters. The function returns a dictionary of the
    accuracy of fitted parameters, which may be captured, or not.

    Parameters:
    system_parameters : dict
        Dictionary containing system parameters, will be used as arguments
        to the systems equations.
    to_fit : dict
        Dictionary containing system parameters to fit.
    xcoords : np.array
        X coordinates of data the system parameters should be fit to
    ycoords : np.array
        Y coordinates of data the system parameters should be fit to
    bounds : dict
        Dictionary of tuples, indexed by system parameters denoting the
        lower and upper bounds of a system parameter being fit, optional,
        default = None

    Returns
    -----
    tuple (dict, dict)
        Tuple containing a dictionary of best fit systems parameters,
        then a dictionary containing the accuracy for fitted variables.
    """

```

### *add\_scatter*

Experimental data can be added plots with the `add_scatter` command, taking a simple list of x and y coordinates

```

def add_scatter(self, xcoords, ycoords):
    """
    Add scatterpoints to a plot, useful to represent real measurement data

    X and Y coordinates may be added to the internal plot, useful when
    fitting to experimental data, and wanting to plot the true experimental

```

values alongside a curve generated with fitted parameters.

```
Parameters
-----
xcoords : list or array-like
          x-coordinates
ycoords : list or array-like
          y-coordinates

"""
```

### *show\_plot*

With curves, scatterpoints and fits applied, we may display the plot

```
def show_plot(
    self,
    title: str = "System simulation",
    xlabel: str = None,
    ylabel: str = None,
    min_x: float = None,
    max_x: float = None,
    min_y: float = None,
    max_y: float = None,
    log_x_axis: bool = False,
    log_y_axis: bool = False,
    pbc_plot_style: dict = pbc_plot_style,
    png_filename: str = None,
    svg_filename: str = None,
    show_legend: bool = True,
):
    """
    Show the PyBindingCurve plot

    Function to display the internal state of the pbc BindingCurve objects
    plot.

    Parameters
    -----
    title : str
        The title of the plot (default = "System simulation")
    xlabel: str
        X-axis label (default = None)
    ylabel : str
        Y-axis label (default = None, causing label to be "[Complex]")
    min_x : float
        X-axis minimum (default = None)
    max_x : float
        X-axis maximum (default = None)
    min_y : float
        Y-axis minimum (default = None)
    max_y : float
        Y-axis maximum (default = None)
    log_x_axis : bool
        Log scale on X-axis (default = False)
    log_y_axis : bool
        Log scale on Y-axis (default = False)
    ma_style : bool
        Apply MA styling, making plots appear like GraFit plots
    png_filename : str
        File name/location where png will be written
    svg_filename : str
        File name/location where svg will be written

    """
```

## pbcsystems and shortcut strings

pbcsystems contains all default systems supplied with PBC, and exports them to the PBC namespace. Systems may be passed as arguments to pbc.BindingCurve objects upon initialization to define the underlying system governing simulation, queries, and fitting. Additionally, the following shortcut strings may be used as shortcuts, all spaces are removed from the input string, and so are represented without whitespace below:

| Shortcut string list                                                                                                                            | pbcs equivalent                         |
|-------------------------------------------------------------------------------------------------------------------------------------------------|-----------------------------------------|
| simple<br>1:1<br>1:1analytical                                                                                                                  | System_analytical_one_to_one_pl         |
| simplemin<br>simpleminimized<br>simpleminimised<br>1:1min<br>1:1minimized<br>1:1minimised                                                       | System_minimizer_one_to_one_pl          |
| simplelagrange<br>1:1lagrange                                                                                                                   | System_lagrange_one_to_one_pl           |
| simplekinetic<br>1:1kinetic                                                                                                                     | System_kinetic_one_to_one_pl            |
| homodimerformation                                                                                                                              | System_analytical_homodimerformation_pp |
| homodimerformationmin<br>homodimerformationminimiser<br>homodimerformationminimizer<br>homodimermin<br>homodimerminimiser<br>homodimerminimizer | System_minimizer_homodimerformation_pp  |
| homodimerformationlagrange<br>homodimer formation lagrange                                                                                      | System_lagrange_homodimerformation_pp   |
| homodimerformationkinetic<br>homodimer formation kinetic                                                                                        | System_kinetic_homodimerformation_pp    |
| competition, 1:1:1                                                                                                                              | System_analytical_competition_pl        |
| competitionmin<br>competitionminimiser<br>competitionminimizer<br>1:1:1min<br>1:1:1minimiser<br>1:1:1minimizer                                  | System_minimizer_competition_pl         |
| competitionlagrange                                                                                                                             | System_lagrange_competition_pl          |
| homodimerbreaking<br>homodimerbreakingmin<br>homodimerbreakingminimiser<br>homodimerbreakingminimizer                                           | System_minimizer_homodimerbreaking_pp   |
| Homodimerbreakinglagrange                                                                                                                       | System_lagrange_homodimerbreaking_pp    |
| Homodimerbreakingkinetic                                                                                                                        | System_kinetic_homodimerbreaking_pp     |
| homodimerbreakinganalytical                                                                                                                     | System_analytical_homodimerbreaking_pp  |
| 1:2<br>1:2min<br>1:2minimizer<br>1:2minimiser                                                                                                   | System_minimizer_1_to_2_pl12            |
| 1:2lagrange                                                                                                                                     | System_lagrange_1_to_2_pl12             |
| 1:3<br>1:3min<br>1:3minimizer<br>1:3minimiser                                                                                                   | System_minimizer_1_to_3_pl123           |
| 1:3lagrange                                                                                                                                     | System_lagrange_1_to_3_pl123            |

|                    |                                |
|--------------------|--------------------------------|
| 1:4<br>1:4lagrange | System_lagrange_1_to_4_pl1234  |
| 1:5<br>1:5lagrange | System_lagrange_1_to_5_pl12345 |

Custom systems can be passed allowing the use of custom binding systems derived from a simple syntax. This is in the form of a string with reactions separated either on newlines, commas, or a combination of the two. Reactions take the form:

- $r1+r2 \leftrightarrow p$

Denoting reactant1 + reactant2 form the product. PBC will generate and solve custom defined constrained systems. Readouts are signified by inclusion of a star (\*) on a species. If no star is found, then the first seen product is used. Some system examples follow:

- "P+L $\leftrightarrow$ PL" - standard protein-ligand binding
- "P+L $\leftrightarrow$ PL, P+I $\leftrightarrow$ PI" - competition binding
- "P+P $\leftrightarrow$ PP" - dimer formation
- "monomer+monomer $\leftrightarrow$ dimer" - dimer formation
- "P+L $\leftrightarrow$ PL1, P+L $\leftrightarrow$ PL2, PL1+L $\leftrightarrow$ PL1L2, PL2+L $\leftrightarrow$ PL1L2" - 1:2 site binding

$K_{DS}$  passed to custom systems use underscores to separate species and product. P+L $\leftrightarrow$ PL would require the KD passed as kd\_p\_l\_pl. Running with incomplete system parameters will prompt for the correct ones.

## pbcbinding.BindingSystem

Custom binding systems may be defined through inheritance from the base class pbcbinding.BindingSystem. This provides basic functionality through a standard interface to PBC, allowing simulation, querying and fitting. It expects the child class to provide a constructor which passes a function for querying the system and a query method. An example pbcbinding.BindingSystem for 1:1 binding solved analytically is defined as follows:

```
class System_analytical_one_to_one_pl(BindingSystem):
    def __init__(self):
        super().__init__(
            analyticalsystems.system01_one_to_one_p_l_kd_pl, analytical=True
        )
        self.default_readout = "p1"

    def query(self, parameters: dict):
        if self._are_ymin_ymax_present(parameters):
            parameters_no_min_max = self._remove_ymin_ymax_keys_from_dict_return_new(
                parameters
            )
            value = super().query(parameters_no_min_max)
            with np.errstate(divide="ignore", invalid="ignore"):
                return (
                    parameters["ymin"]
                    + ((parameters["ymax"] - parameters["ymin"]) * value)
                    / parameters["1"]
                )
        else:
            return super().query(parameters)
```

Here, we see the parent class constructor called upon initialization of the object with two arguments, the first is a python function which calculates the complex concentration present in a 1:1 binding system, which itself takes the appropriate parameters to calculate this. In addition, a flag is set to define when the solution is being solved analytically. The query method examines the content of the system and deals with the presence of y<sub>min</sub> and y<sub>max</sub> to denote a signal is being simulated. Query should ultimately end up calling query on the parent class, which has been set to return the result of the previously assigned function in the constructor.

## pbk.Readout

The pbk.Readout class contains three static methods, not requiring object initialization for use. These methods all take in a system parameters dictionary describing the system, and the y<sub>values</sub> resulting from system query calls (either through simulation or querying for singular values). These readout functions offer a convenient way to transform results. For example, the readout function to transform complex concentration into fraction ligand bound is defined as follows:

```
def fraction_l(system_parameters: dict, y):
    """ Readout as fraction ligand bound """
    return "Fraction l bound", y / system_parameters["l"]
```

This returns a tuple, with the first value being used in labelling of the plot y-axis, and the second the y-values to be plotted; in this case, the original y values divided by the overall starting ligand concentration. Similar functions can be defined and used interchangeably with those found in pbk.Readout.
